# Supplementary material
Source: PubMed Central journal article supplement (PMC3477392)
Supplement: 1121260109_pnas.201121260SI.pdf [file 1121260109_pnas.201121260SI.pdf]

# Supporting Information

Suderman et al. 10.1073/pnas.1121260109

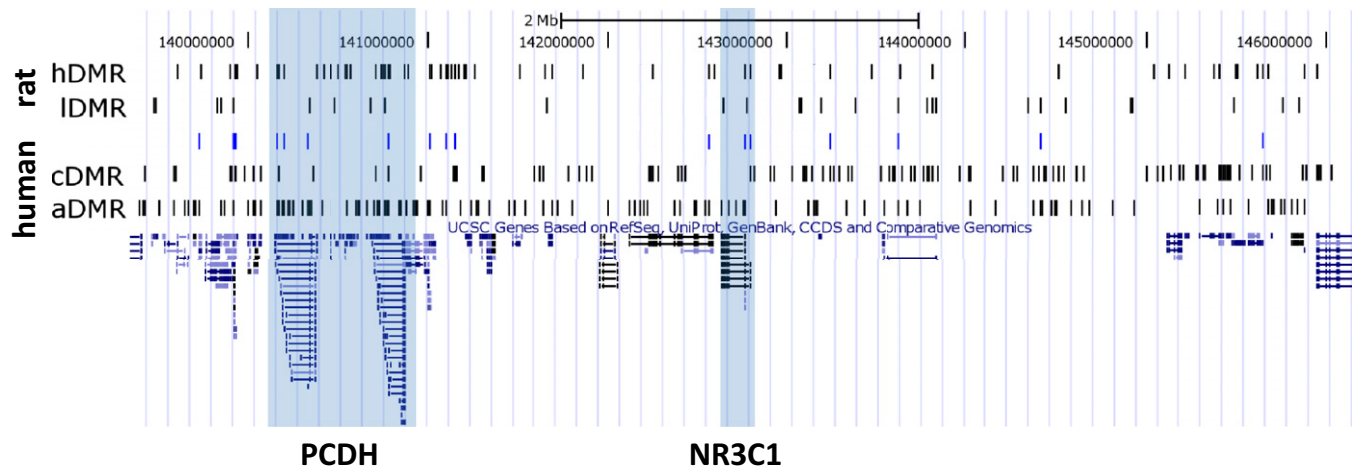

**Fig. S1.** Rat differentially methylated regions (DMRs) associated with maternal care mapped onto human DNA. The top tracks shown in the University of California, Santa Cruz (UCSC) genome browser image identifies the locations on the human genome to which rat DMRs had similar sequence composition as determined by Blat. The middle track shows those locations that are within 1,000 bp of a human DMR. The bottom two tracks show the locations of the human DMRs.

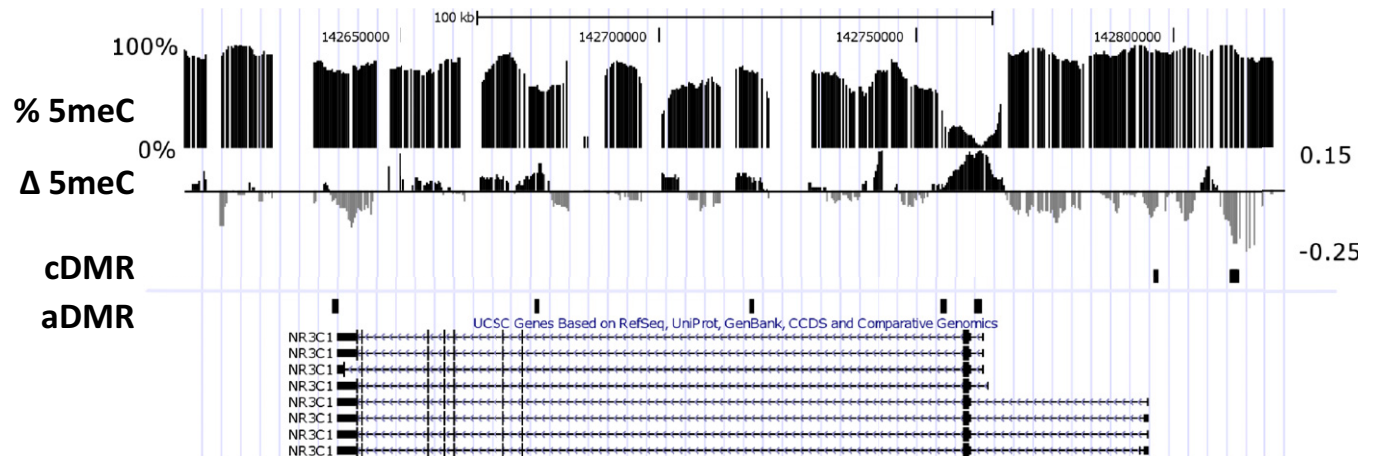

**Fig. S2.** Association of human DNA methylation with early life abuse across *NR3C1*. Tracks are shown in the UCSC genome browser that display average methylation levels (% 5meC) across all samples estimated from microarray probe intensities, mean log<sub>2</sub> fold differences ( $\Delta$  5meC) between abuse and control samples (where positive values are shown in black and indicate higher methylation in abuse samples, and gray values indicate higher methylation in control samples), the locations of cDMRs (significantly higher methylation in control samples), and the locations of aDMRs (significantly higher methylation in abuse samples). The bottom track shows the coordinates of the *NR3C1* gene.

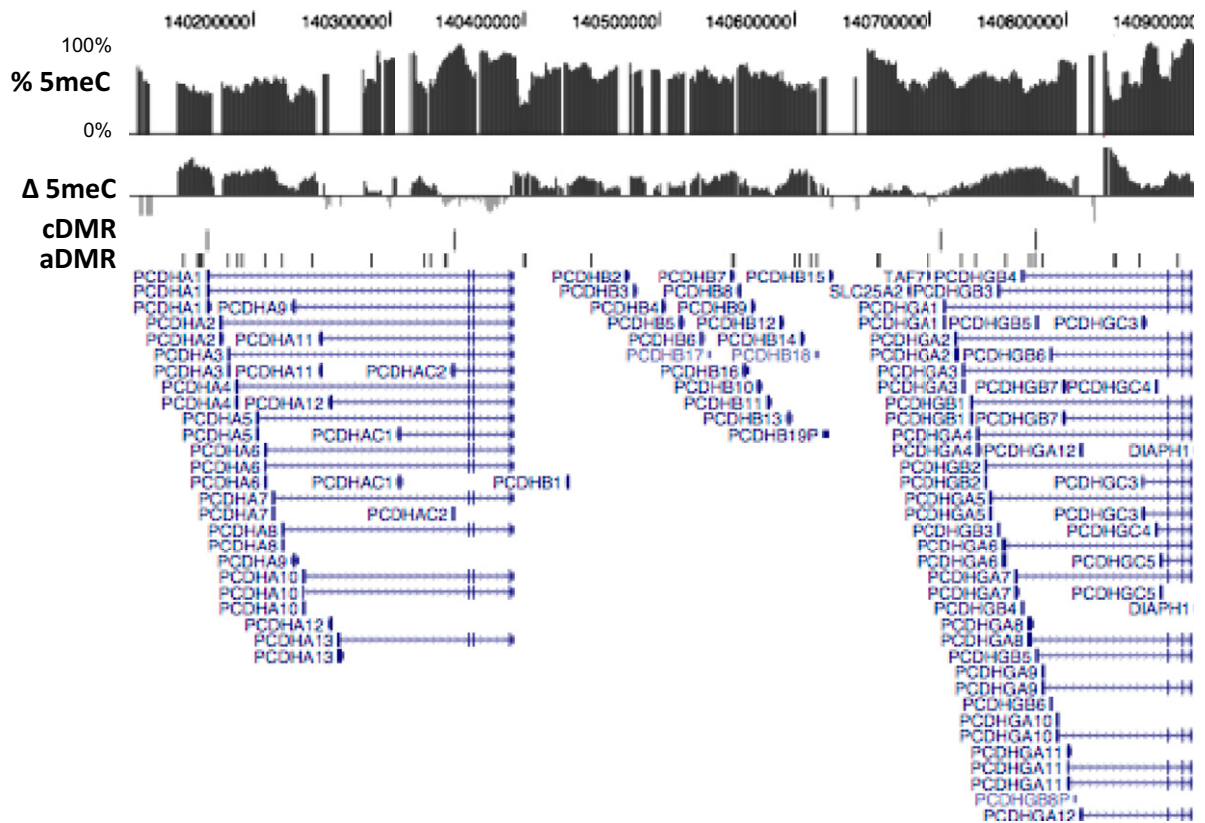

**Fig. S3.** Association of human DNA methylation with early life abuse across the *Pcdh* gene clusters. Tracks are shown in the UCSC genome browser as in Fig. S2, this time spanning the *Pcdh* gene clusters.

**Table S1. Gene promoters containing DNA methylation levels associated with early life abuse in humans**

| Symbol       | Ensembl ID      | More methylated in | Ensembl ID (rat)   | More methylated in (rat) |
|--------------|-----------------|--------------------|--------------------|--------------------------|
| AC116353.2-2 | ENSG00000113141 | Abuse              | ENSRNOG00000017251 |                          |
| ARHGAP26     | ENSG00000145819 | Abuse              | ENSRNOG00000013920 |                          |
| CSorf16      | ENSG00000164620 | Abuse              | ENSRNOG00000019575 |                          |
| DND1         | ENSG00000183403 | Abuse              | ENSRNOG00000016894 | High                     |
| HBEGF        | ENSG00000113070 | Abuse              | ENSRNOG00000018646 | Low                      |
| HDAC3        | ENSG00000171720 | Abuse              | ENSRNOG00000019618 |                          |
| KIAA0141     | ENSG00000081791 | Abuse              | ENSRNOG00000019276 |                          |
| PCDHA13      | ENSG00000081842 | Abuse              | ENSRNOG00000020119 |                          |
| PCDHA3       | ENSG00000204968 | Abuse              | ENSRNOG00000020234 | Low                      |
| PCDHA5       | ENSG00000204965 | Abuse              |                    |                          |
| PCDHA6       | ENSG00000204964 | Abuse              |                    |                          |
| PCDHA7       | ENSG00000204963 | Abuse              |                    |                          |
| PCDHB15      | ENSG00000113248 | Abuse              | ENSRNOG00000020028 |                          |
| PCDHGA12     | ENSG00000081853 | Abuse              |                    | Low                      |
| PCDHGA2      | ENSG00000204955 | Abuse              | ENSRNOG00000034126 |                          |
| PCDHGA6      | ENSG00000214580 | Abuse              | ENSRNOG00000027296 |                          |
| PCDHGB7      | ENSG00000214570 | Abuse              | ENSRNOG00000039454 |                          |
| PFDN1        | ENSG00000113068 | Abuse              | ENSRNOG00000018653 |                          |
| PLAC8L1      | ENSG00000173261 | Abuse              | ENSRNOG00000018820 |                          |
| POU4F3       | ENSG00000091010 | Abuse              | ENSRNOG00000018842 |                          |
| RBM27        | ENSG00000091009 | Abuse              | ENSRNOG00000027250 |                          |
| SPRY4        | ENSG00000187678 | Abuse              | ENSRNOG00000013851 |                          |
| TCERG1       | ENSG00000113649 | Abuse              | ENSRNOG00000018849 |                          |
| WDR55        | ENSG00000120314 | Abuse              |                    |                          |
| YIPF5        | ENSG00000145817 | Abuse              | ENSRNOG00000014564 | Low                      |
| APBB3        | ENSG00000113108 | Control            | ENSRNOG00000017849 |                          |
| NR3C1        | ENSG00000113580 | Control            | ENSRNOG00000014096 |                          |
| PCDHA4       | ENSG00000204967 | Control            |                    |                          |

Genes are listed whose promoters contain DMRs. The last two columns indicate the orthologous rat gene identifier and whether the orthologous gene promoter contains a DMR in the rat data set. Promoters are defined as the region from 2,000 bp upstream to 200 downstream of the gene transcription start site.

**Table S2. Regions spanning >100 Kb containing no significant DNA methylation associations with early life abuse in humans**

| Chr | Start     | End       | Genes                                                                                |
|-----|-----------|-----------|--------------------------------------------------------------------------------------|
| 5   | 139727792 | 139842017 | ANKHD1, U4                                                                           |
| 5   | 140449572 | 140553729 | AC074130.3, PCDHB10, PCDHB16, PCDHB2, PCDHB3, PCDHB4, PCDHB5, PCDHB6, PCDHB7, PCDHB8 |
| 5   | 141339508 | 141446791 | GNPDA1                                                                               |
| 5   | 141992319 | 142128928 | FGF1                                                                                 |
| 5   | 143840561 | 143962140 | 7SK, AC008716.7-1                                                                    |
| 5   | 144019854 | 144161558 |                                                                                      |
| 5   | 144675916 | 144810451 |                                                                                      |
| 5   | 144811452 | 144924824 |                                                                                      |

The first three columns provide the coordinates of the region spanned, and the final column (Genes) lists the genes within the region. Chr, chromosome.

**Table S3. Primers for quantitative real-time PCR of immunoprecipitated samples**

| Gene     | ID    | Forward                  | Reverse                  | Chr | Start     | End       | TSS distance |
|----------|-------|--------------------------|--------------------------|-----|-----------|-----------|--------------|
| HBEGF    | h28   | CCAGGCTTCTGAGATTGGAG     | AAAAGCACATGGGTGGAAG      | 5   | 139707017 | 139707197 | -748         |
| KIAA0141 | h33.3 | CATAACTTTTGCCACGTCTGAA   | CGGTCCAGCTTATCTCACTGT    | 5   | 141282899 | 141283091 | -598         |
| PCDHA3   | h3    | TGAGGAGTGACCGAAGGATATT   | GCACGCTGTTATTTCTTTTGTG   | 5   | 140160659 | 140160825 | -225         |
| PCDHA5   | h53.2 | TGGAACCTAAACATTTTGTGAAA  | TTTGGTAAATCGCTTTGCACT    | 5   | 140180487 | 140180669 | -967         |
| PCDHA6   | h56   | TGAATGATGGCCGACGCAGAAGAA | GAGGAGCAGACATTGCTTTCCCAA | 5   | 140187753 | 140187908 | -31          |
| PCDHA7   | h38   | AAGCACATGGTTCCCATAGAG    | TCCTGGTGTATTGCAGTAGCTT   | 5   | 140192773 | 140193022 | -1256        |
| PCDHB3   | h21.2 | GCAATGGCTTCCTTTTGTTC     | GTGTGAAGCCCTGAGAGAG      | 5   | 140459169 | 140459342 | -1163        |
| PCDHGC5  | h51   | AATGTCTCCACGGAATGCT      | GCTAGCCGTTCTGCAAGTCT     | 5   | 140835253 | 140835458 | -398         |
| POU4F3   | h35   | CAGCAGAAATGCACTGAAGG     | CACGCTTGCCCTTCTTTCTT     | 5   | 145697899 | 145698054 | -804         |
| RMB27    | h16.4 | TGCCAATCAACATGAGTGTGTA   | GTTCTTCTCTCTGTTTTTCT     | 5   | 145562859 | 145563016 | -448         |
| TCERG1   | h24.2 | AGTTCTGCTTACCGCGAGAG     | ATCGGTTGGTCAAACTTTC      | 5   | 145806817 | 145807004 | -156         |

Chr, chromosome.
